# Supplementary material
Source: publisher site journal article supplement (https://www.dovepress.com/article/supplementary_file/603485/603485_Supplementary%20Material.docx)
Supplement: Supplementary file 1 [file 603485_Supplementary%20Material.docx]

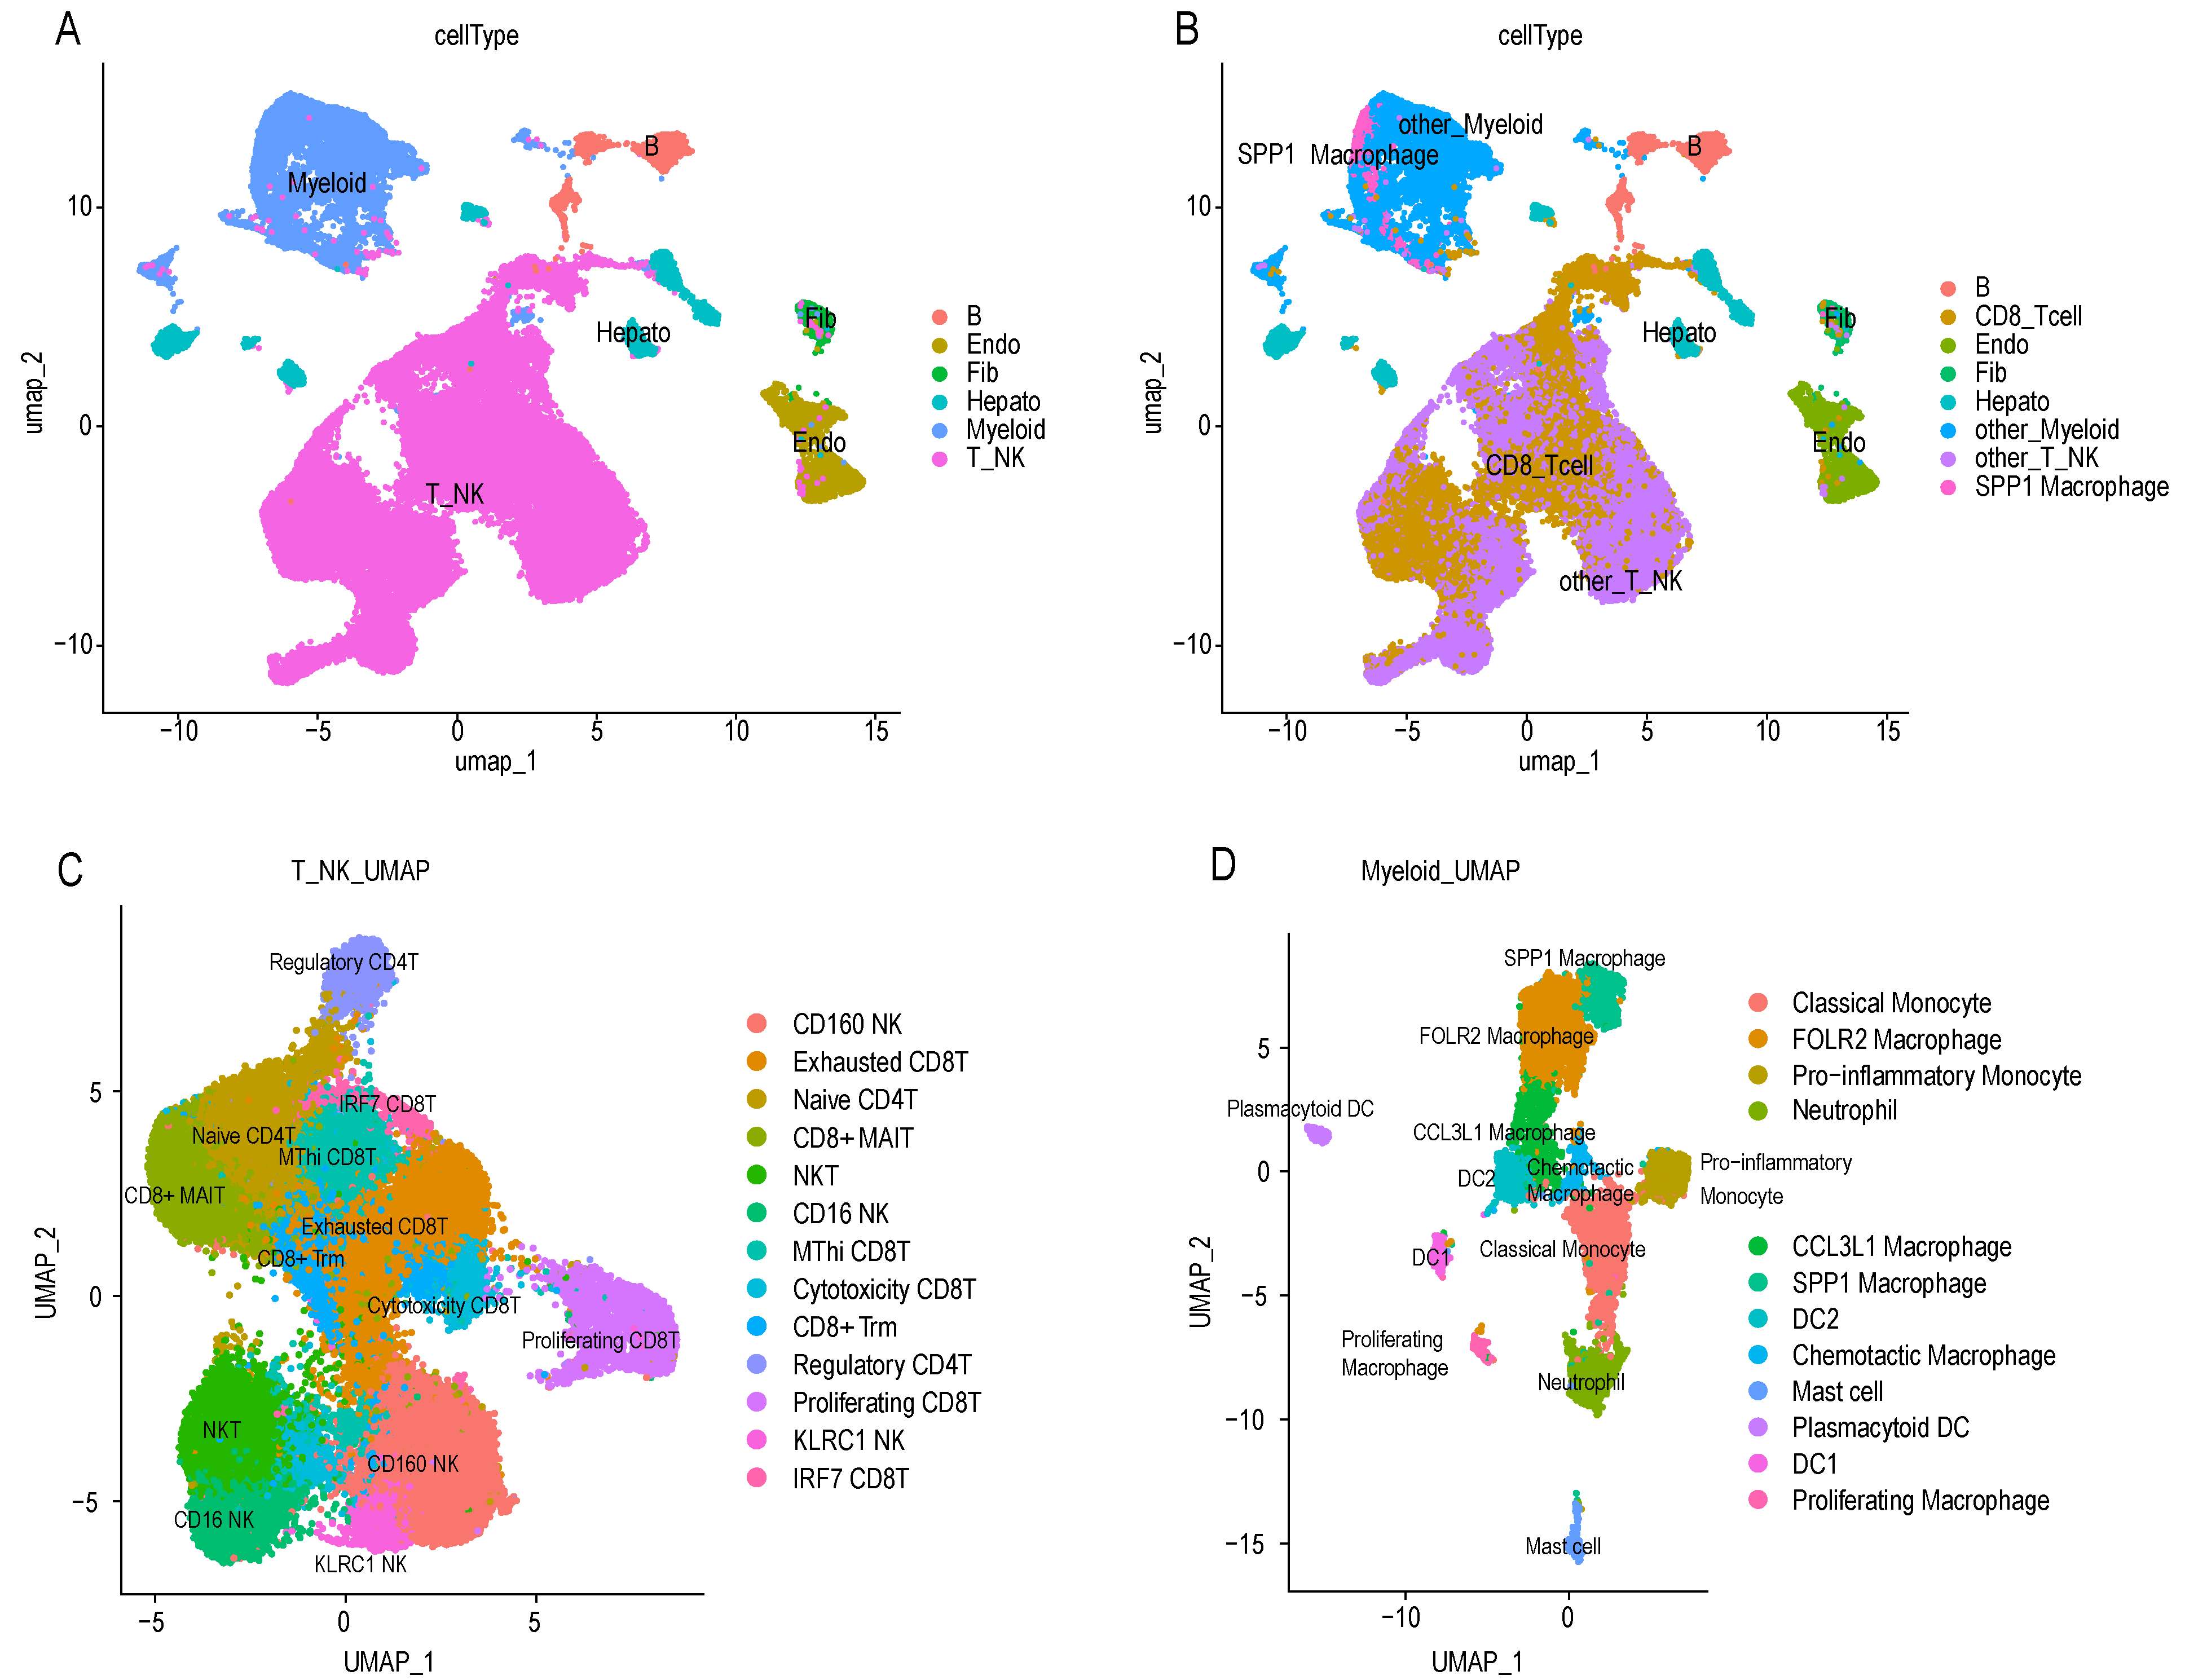


# Supplementary Figure 1. Cell annotation UMAP plot of single-cell sequencing data matched with spatial transcriptome data.

1. UMAP of 6 major cell types corresponding to scRNA-seq of spatial transcriptome.

(B) UMAP of 8 major cell types after re labeling CD8+ T cells and SPP1+ macrophages corresponds to scRNA-seq of the spatial transcriptome.

(C) UMAP of T/NK cell subtypes.

(D) UMAP of Myeloid cell subtype.

Note: These two UMAPs are consistent with Figure 2A in the original text (Liu et al, 202319).


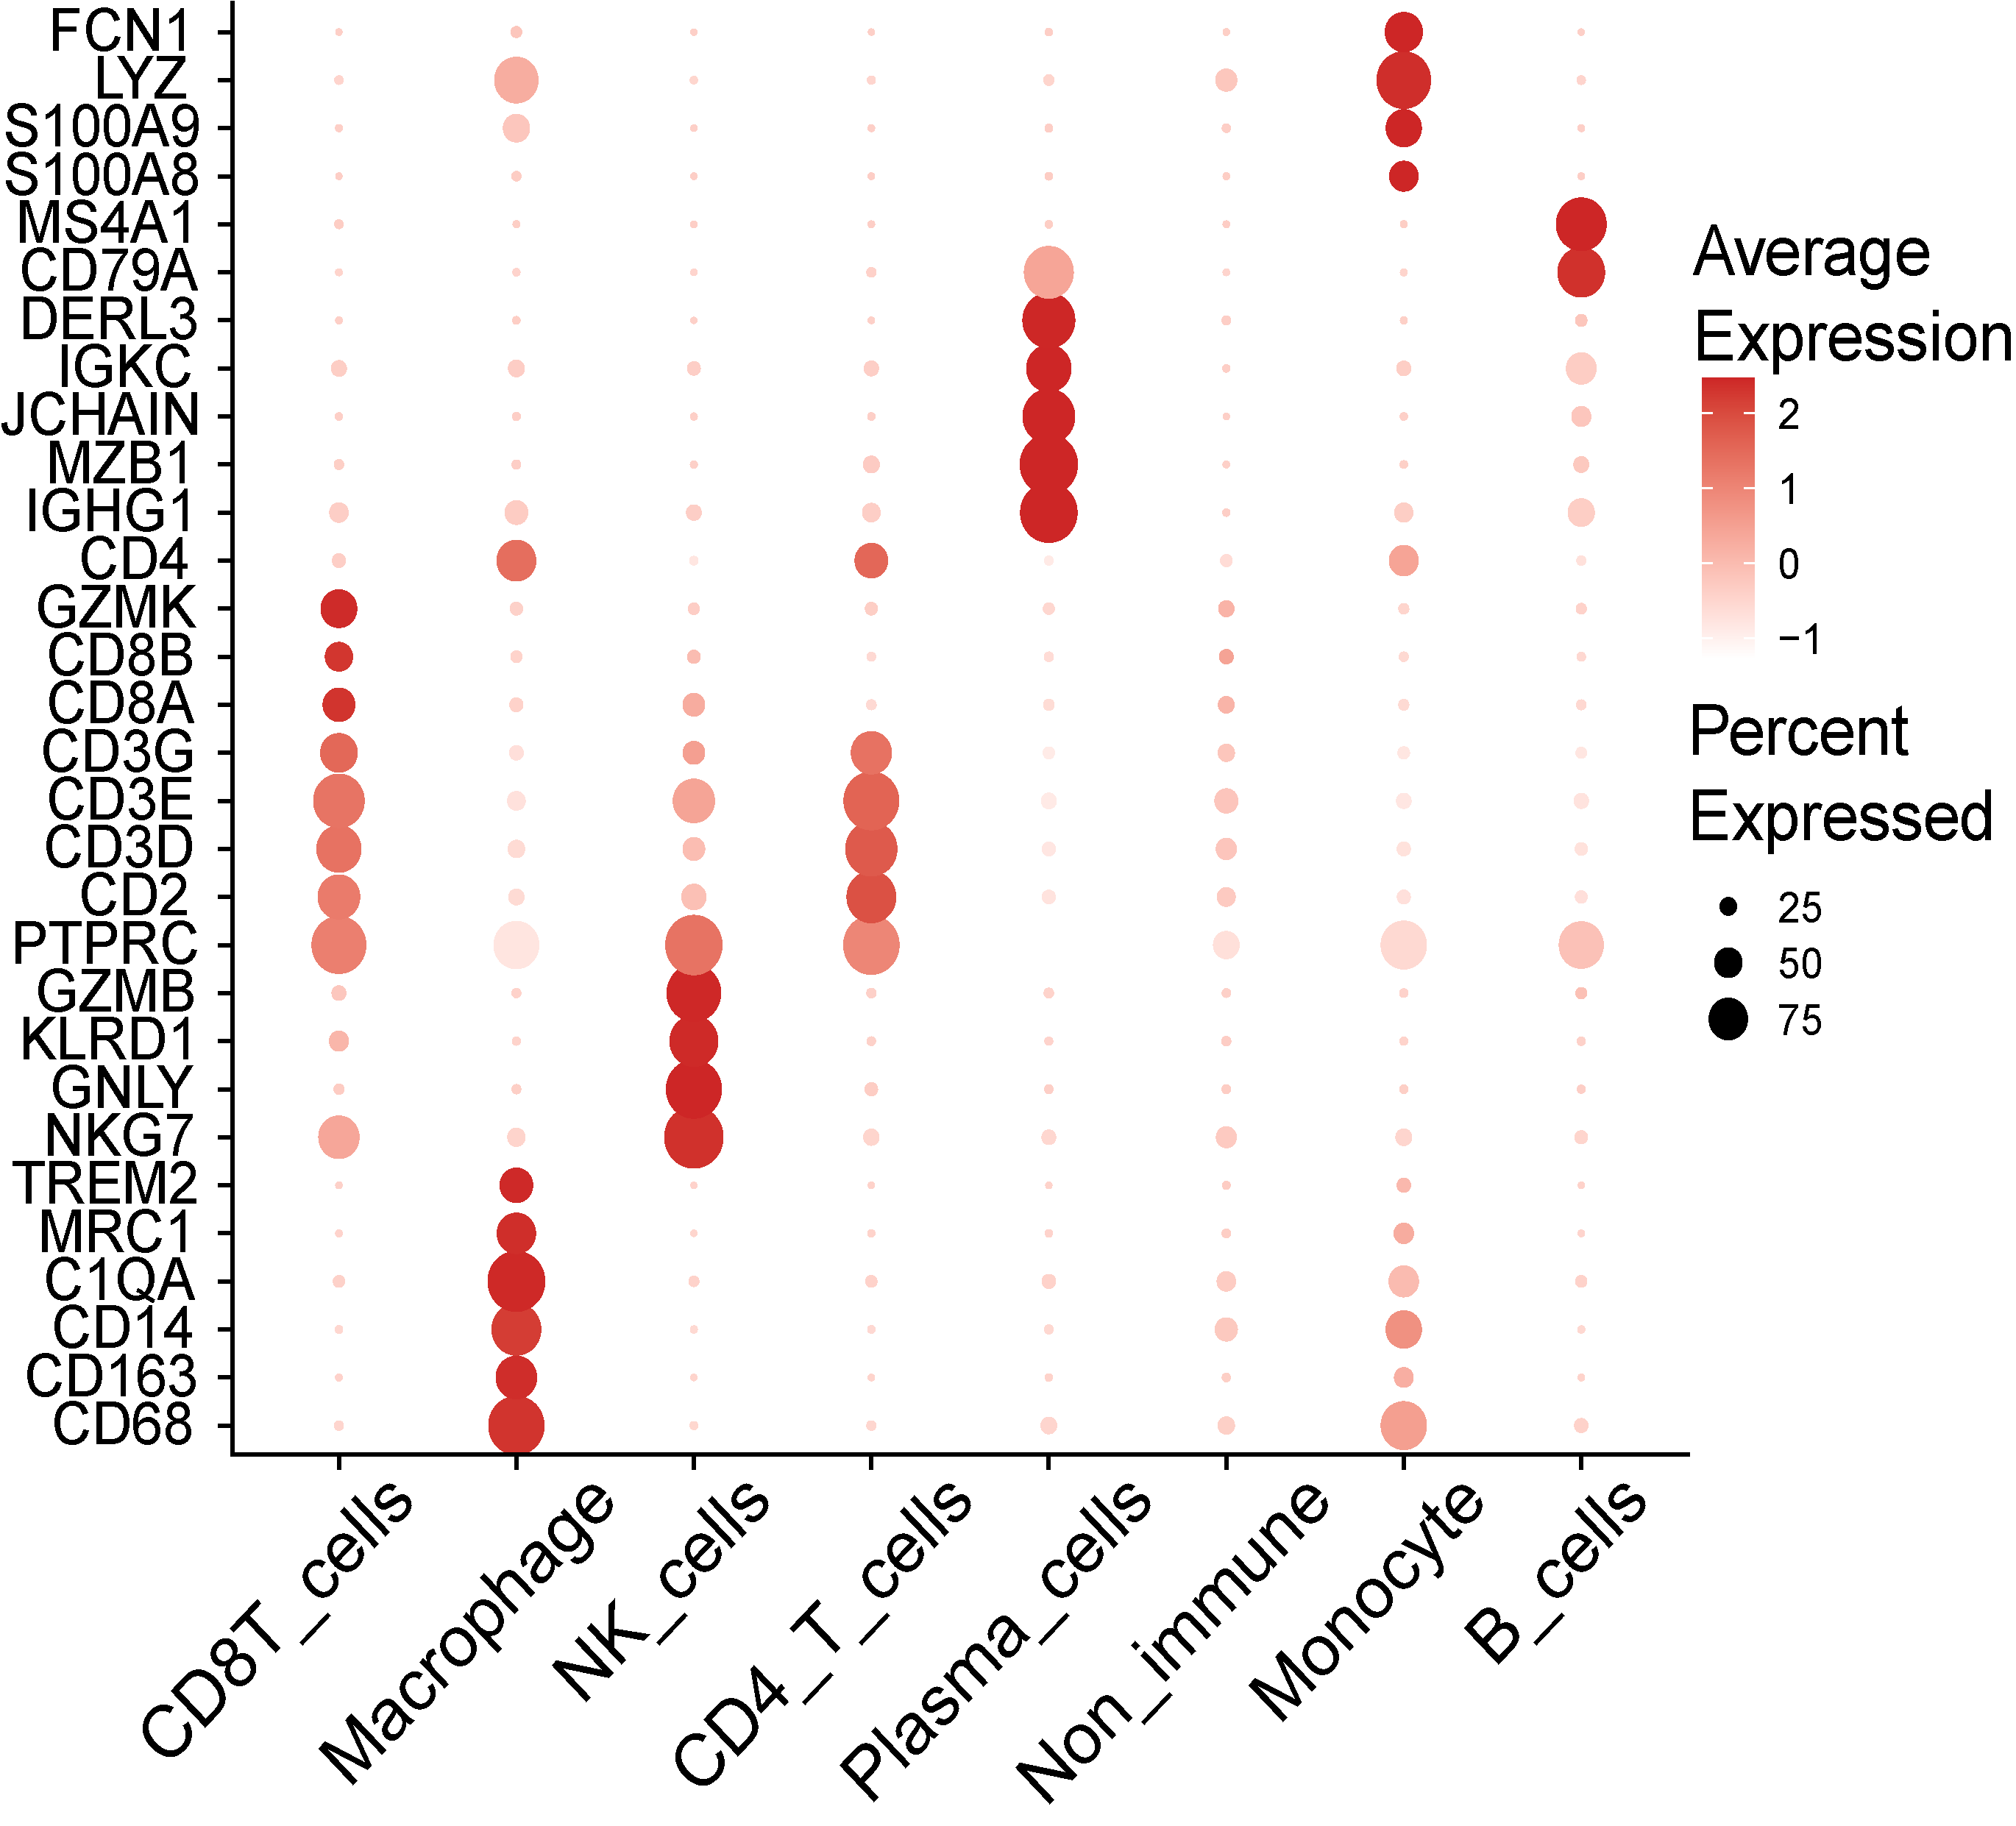


# Supplementary Figure 2. Visualization of annotated genes for seven types of immune cell types using bubble plots


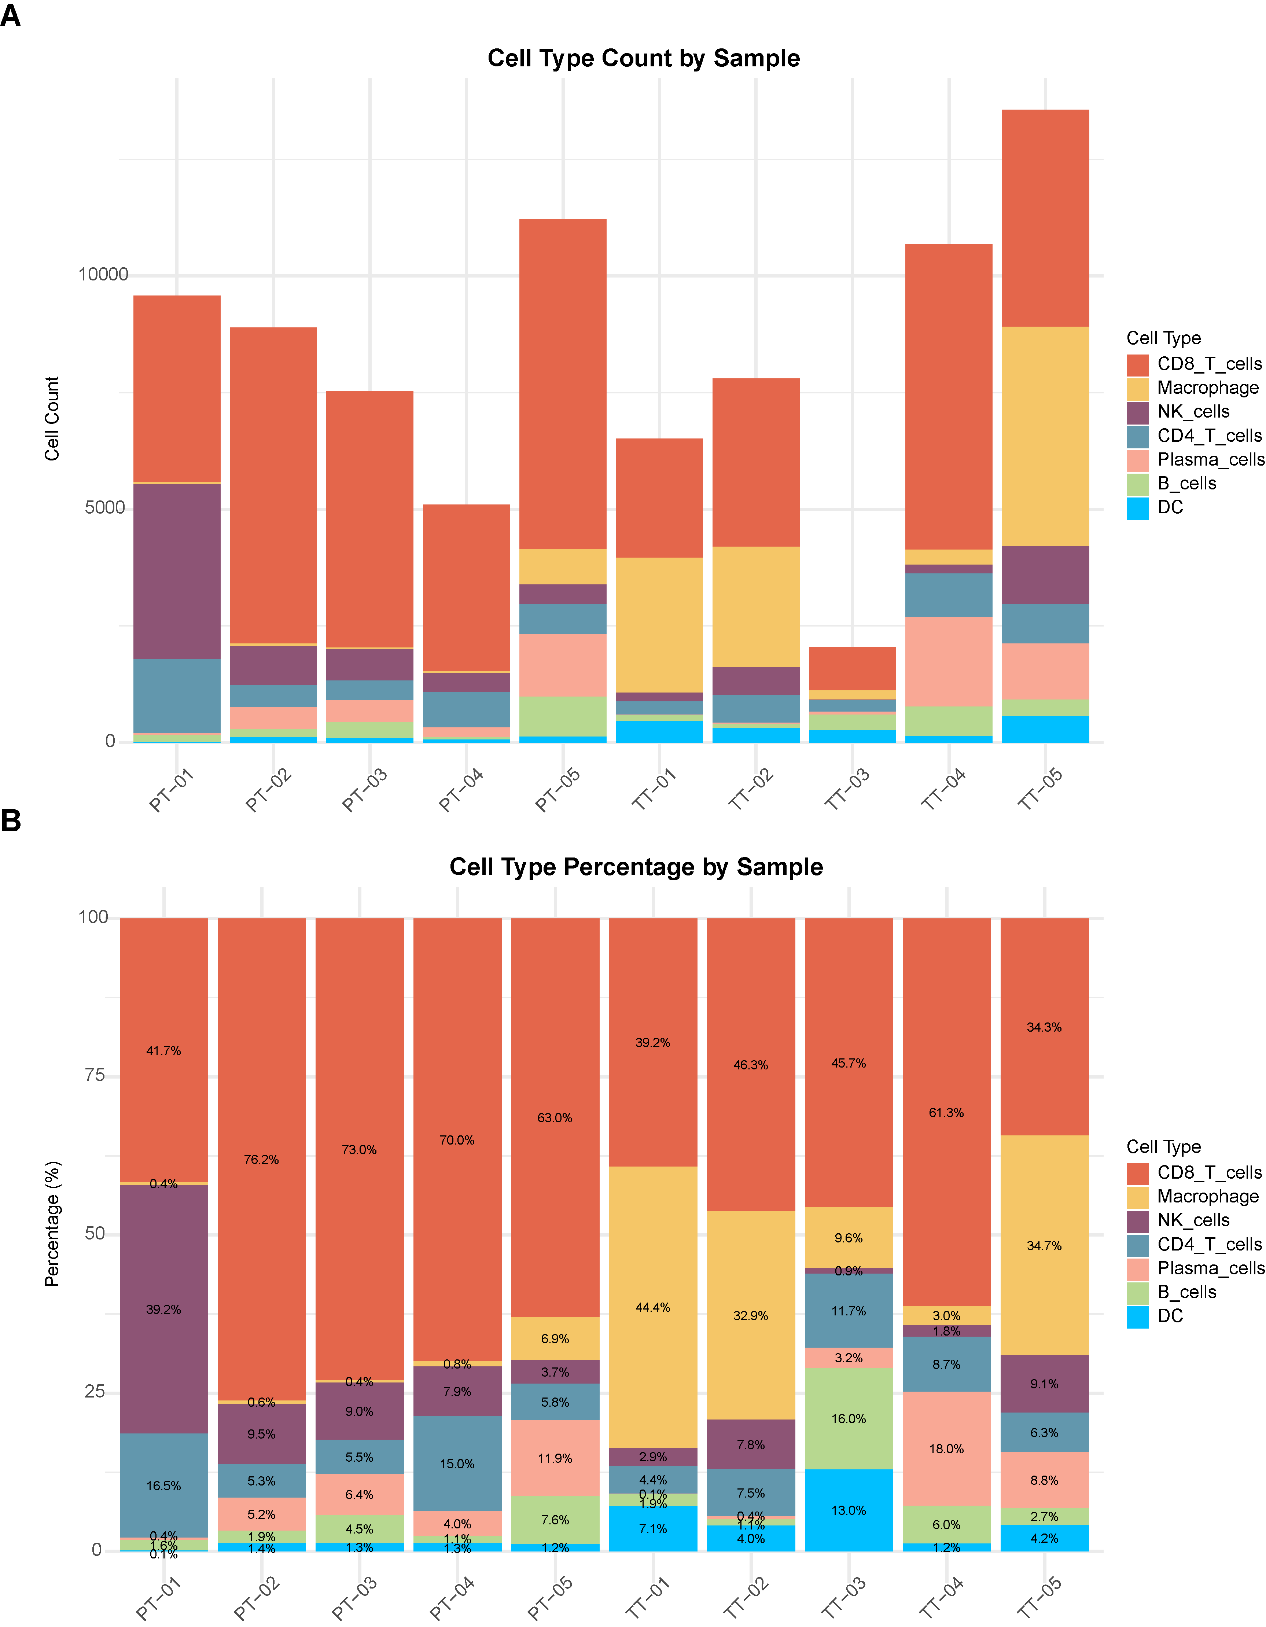


# Supplementary Figure 3. Stacked bar chart showing cell counts and cell proportions of each patient

(A) Stacked bar chart of cell counts for different cell types for each patient.

(B) Stacked bar chart of cell percentage for different cell types for each patient.


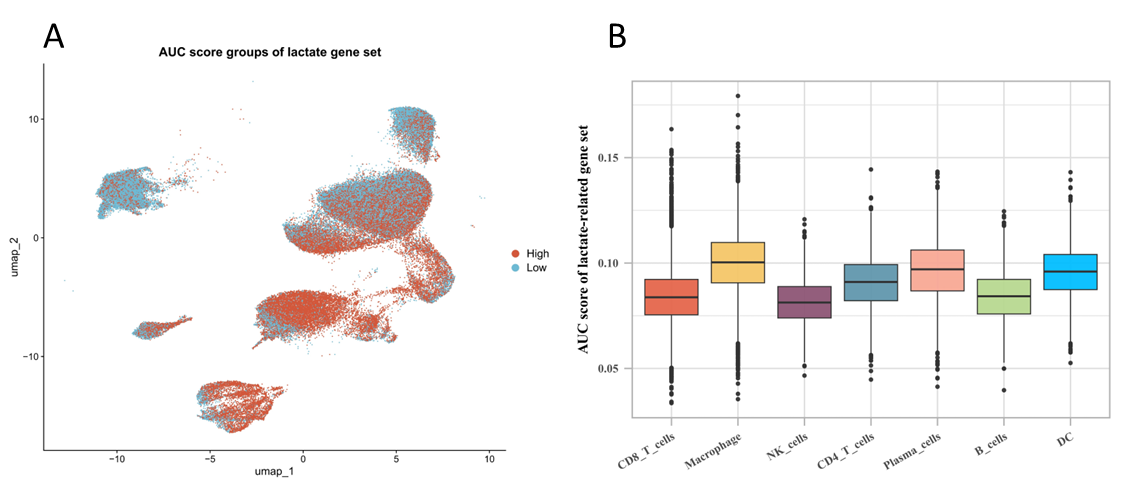


# Supplementary Figure 4. Visualization of AUC score for lactate related gene set.

1. High and low AUC score groups of lactate-related gene set in our single-cell sequencing data.
2. AUC score of lactate related gene set in our different single-cell types.


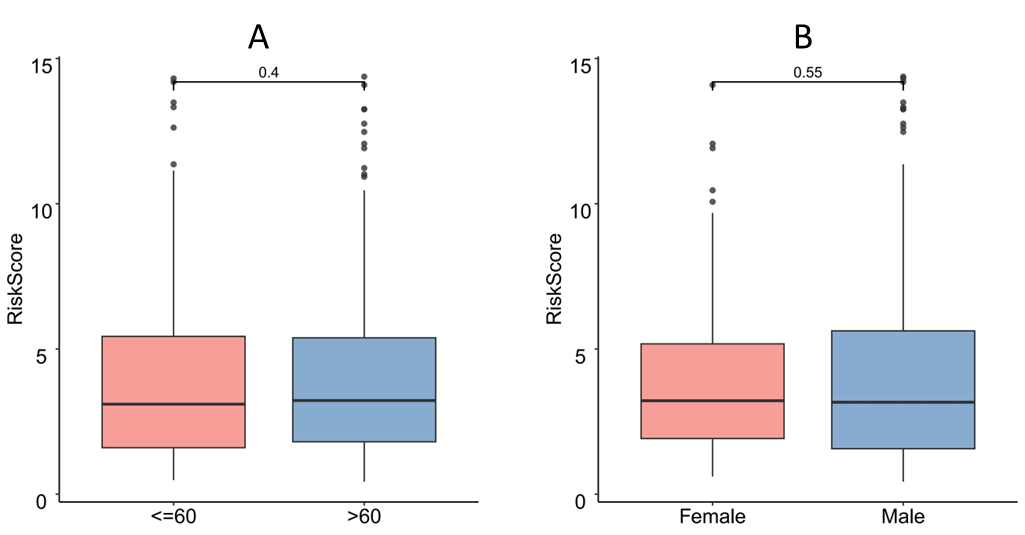


# Supplementary Figure 5. Comparison of risk scores among different age and gender groups.

1. Comparison of risk scores among different age groups (≤ 60 vs.＞60 years).
2. Comparison of risk scores among different age groups (Female vs. Male).


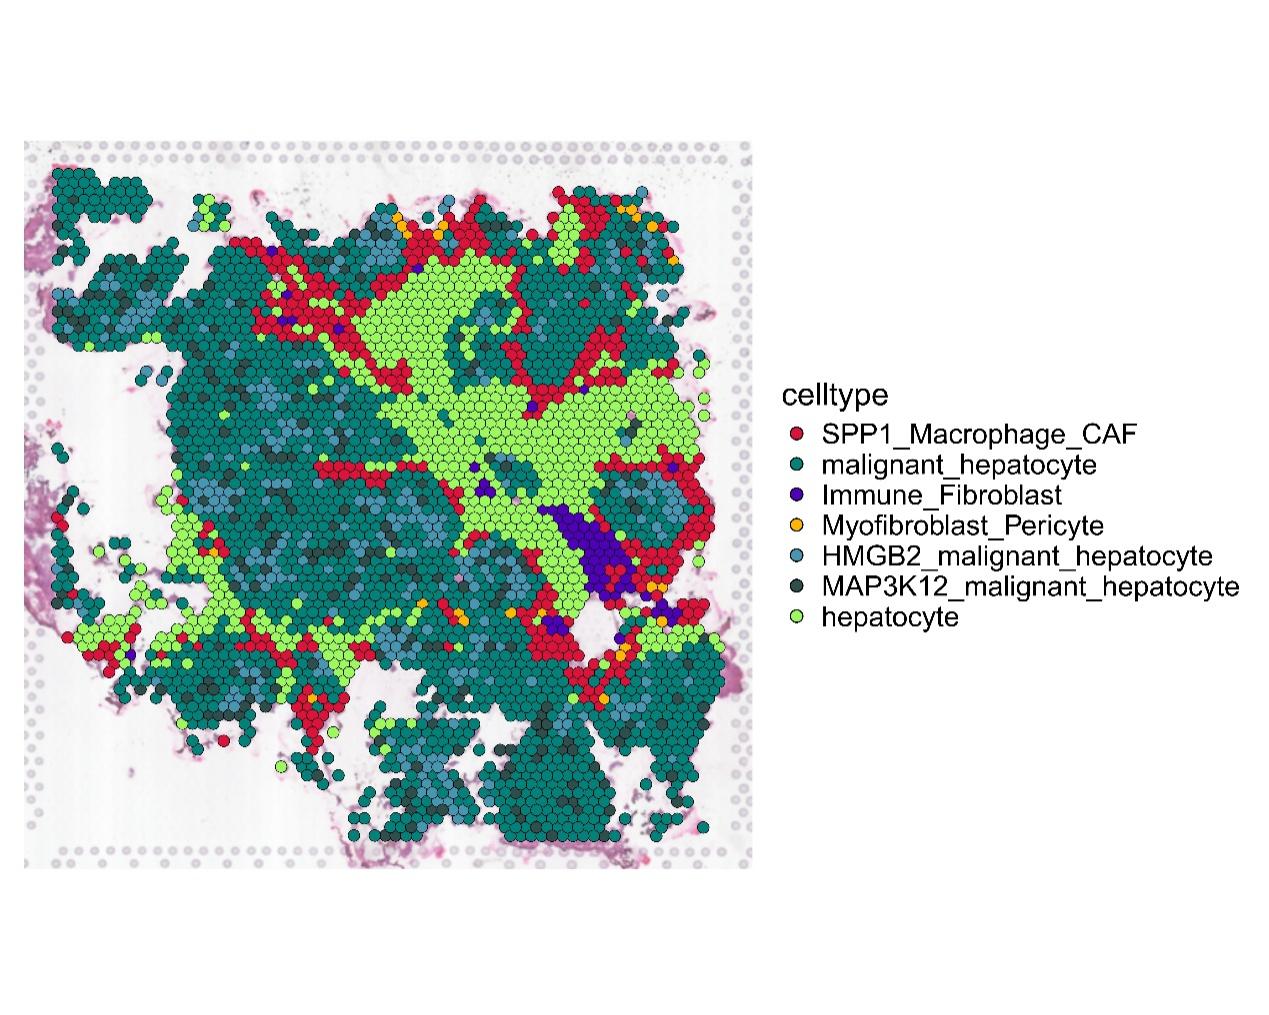


# Supplementary Figure 6. The spatial distribution of different cell subtypes.

The immune barrier formed by SPP1 macrophage infiltration (Red) in the pathological section of patient # 1 is consistent with Figure 1C in the original text (Liu et al, 202319).

# Supplementary Box 1. List of 484 lactate-related genes

| ABCG8 | LIPA | TPP1 | FASTKD2 | MT-ND3 | PDHX | TIMM50 | H4C6 | GPM6A | H2AC14 | NBN |
| --- | --- | --- | --- | --- | --- | --- | --- | --- | --- | --- |
| ACAD9 | LMO1 | USB1 | FBXL4 | MT-ND4 | PDP1 | TK2 | H2BC3 | YTHDF2 | H2AC18 | TFEB |
| ACADM | LPIN1 | VPS13A | FDX2 | MT-ND5 | PDSS1 | TMEM126B | H4C11 | YTHDF1 | H2AC21 | H2AC17 |
| AIFM1 | LYST | XK | GFM1 | MT-ND6 | PDSS2 | TMEM70 | H4C9 | RUBCNL | H2AC15 | H2AC8 |
| AKR1D1 | MLIP | ZNFX1 | GFM2 | MT-TF | PET100 | TPK1 | H3C3 | NREP | H2AC7 |  |
| ALDOA | MPL | AARS2 | GK | MT-TH | PET117 | TRMT10C | H4C8 | FASN | H2AC19 |  |
| ALK | MT-CO1 | ACACA | GLRX5 | MT-TI | PHKG2 | TRMT5 | H2BC11 | AXIN1 | H2BC20P |  |
| B3GALNT2 | MT-CO3 | ACAT1 | GOT2 | MT-TK | PLPBP | TRMU | H2BC15 | SOX9 | H2BC19P |  |
| B4GAT1 | MTHFD1 | ACAT2 | GTPBP3 | MT-TL1 | PMPCB | TSFM | H3C10 | NCOA4 | CGAS |  |
| CALR | MVK | ADAMTS13 | GYS2 | MT-TL2 | PNPLA8 | TUFM | H3C11 | TRA-TGC7-1 | SIRT3 |  |
| CAV3 | MYC | AGK | HADHB | MT-TN | PNPO | TWNK | H3C4 | PIK3C3 | HDAC2 |  |
| CBLIF | MYCN | ALDH6A1 | HIBCH | MT-TP | PNPT1 | TXN2 | H3C6 | NMNAT1 | HDAC1 |  |
| CD46 | NSUN2 | AMPD1 | HMGCL | MT-TQ | POLG | UPB1 | H3C8 | APOC2 | PAX6 |  |
| CDAN1 | OBSCN | AMPD2 | HPDL | MT-TS1 | POLG2 | UQCC2 | H4C12 | ULK1 | IDH3B |  |
| CFH | OCRL | AMPD3 | HS6ST2 | MT-TS2 | POLRMT | UQCC3 | H4C2 | NR4A3 | CENPA |  |
| CFI | PEX2 | ATAD3A | HSD17B10 | MT-TV | PPCS | UQCRB | H2BC1 | HMGB1 | BDNF-AS |  |
| CHEK2 | PFKM | ATP5F1A | HSPD1 | MT-TW | PRORP | UQCRC2 | H2BC12 | RUNX2 | KRAS |  |
| CLN5 | PHOX2B | ATPAF2 | HTRA2 | MTFMT | PRSS12 | UQCRH | H2BC13 | SHMT2 | F2 |  |
| COL4A1 | PIEZO1 | BCS1L | IFT56 | MTO1 | PUS1 | UQCRQ | H2BC4 | METTL3 | PCSK9 |  |
| CPT2 | PIGA | C1QBP | ISCA1 | MTRFR | PYGL | WARS2 | H2BC9 | GCKR | MIF |  |
| CRPPA | PIK3CG | CA5A | ISCU | NADK2 | RARS1 | YARS1 | H3C14 | SP100 | ALDOB |  |
| CTSD | PITRM1 | CARS2 | KARS1 | NARS2 | RARS2 | YARS2 | H3C7 | FIS1 | FOXP3 |  |
| DAG1 | PLA2G6 | CDK5 | LARS2 | NAXD | RMND1 | YME1L1 | H4C13 | SLC16A4 | SLC4A4 |  |
| DHFR | PLEC | CHCHD10 | LETM1 | NAXE | RNASEH1 | ACACB | H4C4 | ALKBH3 | CRYAB |  |
| DNAJC5 | PNPLA2 | CLPB | LIAS | NDUFA1 | RRAGC | EMB | H2BC17 | YAP1 | AKR1B10 |  |
| FKRP | POMGNT1 | COG3 | LIPT1 | NDUFA11 | RRM2B | SLC16A1 | H2BC10 | STK11 | ATXN7 |  |
| FKTN | POMGNT2 | COQ4 | LIPT2 | NDUFA12 | SARS2 | SLC16A3 | H2BC18 | LRP1 | SST |  |
| FLI1 | POMK | COQ8A | LONP1 | NDUFA13 | SCO1 | SLC16A7 | H2BC26 | ARF1 | CEACAM6 |  |
| GAA | POMT1 | COQ9 | LRPPRC | NDUFA6 | SCO2 | SLC16A8 | H2BC6 | NAT10 | CNMD |  |
| GATA1 | POMT2 | COX10 | LYRM7 | NDUFA8 | SDHA | SLC5A12 | H2BC8 | RARG | MIR125A |  |
| GATA2 | RB1 | COX11 | MDH2 | NDUFA9 | SDHB | SLC5A8 | H3C15 | GPR37 | MIR133B |  |
| GCLC | RHAG | COX14 | MECP2 | NDUFAF1 | SERAC1 | AARS1 | H4C15 | KCNK1 | MIR208B |  |
| GRN | RHCE | COX20 | MICOS13 | NDUFAF4 | SFXN4 | CREBBP | H2BC7 | TRAP1 | SOD2-OT1 |  |
| HACE1 | RHD | COX4I1 | MIPEP | NDUFAF6 | SLC25A10 | EP300 | H2BC12L | NR6A1 | MAPK6P4 |  |
| HBB | RPS14 | COX5A | MPC1 | NDUFB8 | SLC25A12 | MRE11 | ATM | OSBP2 | LDHB |  |
| HELLPAR | RXYLT1 | COX6A2 | MRPL12 | NDUFB9 | SLC25A26 | H3C1 | KAT2A | UNC119B | LIN28B |  |
| HLA-DRB1 | SAT1 | COX6B1 | MRPL3 | NDUFC2 | SLC25A3 | H4C14 | DCBLD1 | CYTOR | TOP2A |  |
| HMGCS2 | SIL1 | COX8A | MRPL39 | NDUFS1 | SLC25A4 | H3-3A | ACSF2 | SIRT1 | TP53 |  |
| HMOX1 | SLC19A1 | CRAT | MRPL44 | NDUFS2 | SLC25A42 | H2AZ1 | CERNA3 | KPNA4 | ECHS1 |  |
| INPP5K | SLC25A13 | CYC1 | MRPS14 | NDUFS3 | SLC31A1 | H2BC21 | HDAC3 | H2AC20 | FARS2 |  |
| IRAK1 | SLC4A1 | CYP27A1 | MRPS16 | NDUFS8 | SOD1 | H3-3B | YY1 | H2AC4 | MT-ND1 |  |
| JAK2 | SLC7A7 | DARS2 | MRPS2 | NDUFV1 | STAT2 | H4C3 | MLH1 | H2AC6 | MT-ND2 |  |
| KCNN4 | SPP1 | DGUOK | MRPS22 | NFS1 | SUCLA2 | H4C16 | MYH6 | H2AC11 | PC |  |
| KIF23 | STAT4 | DLD | MRPS28 | NFU1 | SUCLG1 | H3C12 | CALML5 | H2AC13 | PDHA1 |  |
| KLF1 | STIM1 | DNAJC19 | MRPS34 | NGLY1 | SURF1 | H4C1 | LUC7L2 | H2AC25 | TEFM |  |
| KY | TCIRG1 | DNM1L | MRPS7 | NSUN3 | SYNJ1 | H2BC14 | TEAD1 | H2AC1 | TIMM22 |  |
| LARGE1 | TET2 | DTYMK | MT-ATP6 | OGDH | TANGO2 | H2BC5 | KAT5 | H2AC12 | H3C2 |  |
| LDHA | TOMM7 | EARS2 | MT-CO2 | OPA1 | TARS2 | H3C13 | RAD50 | H2AC16 | H4C5 |  |

# Supplementary Table 1. Distribution differences of seven immune cells between PT group and TT group

| **CellType** | **OR (95% CI)** | **P value** | **Sig.** |
| --- | --- | --- | --- |
| CD8_T_cells | 0.44 (0.29-0.65) | <0.001 | *** |
| Macrophage | 26.51 (12.98-54.14) | <0.001 | *** |
| NK_cells | 0.29 (0.12-0.70) | 0.006 | ** |
| CD4_T_cells | 0.85 (0.54-1.34) | 0.486 | ns |
| Plasma_cells | 0.54 (0.11-2.68) | 0.448 | ns |
| B_cells | 1.39 (0.66-2.90) | 0.383 | ns |
| DC | 5.85 (2.45-13.92) | <0.001 | *** |

Note: P-values were calculated using generalized linear mixed models (GLMM). OR, odds ratio. CI, confidence interval. ** P < 0.01, *** P < 0.001，ns, not significant (P ≥ 0.05).

# Supplementary Table 2. Comparison of IC50 values of different drugs in high-risk and low risk groups

| **Drug** | **IC50** | **Drug** | **IC50** | **Drug** | **IC50** | **Drug** | **IC50** |
| --- | --- | --- | --- | --- | --- | --- | --- |
| A.443654 | lower | Bicalutamide | higher | Docetaxel | lower | KIN001.135 | higher |
| A.770041 | NA | BIRB.0796 | lower | Axitinib | higher | KU.55933 | lower |
| ABT.263 | lower | Bleomycin | lower | EHT.1864 | NA | Lapatinib | higher |
| ABT.888 | lower | BMS.509744 | NA | Elesclomol | higher | Lenalidomide | higher |
| AG.014699 | higher | BMS.536924 | higher | Embelin | NA | LFM.A13 | higher |
| AICAR | NA | BMS.708163 | higher | Epothilone.B | lower | Metformin | NA |
| AKT.inhibitor.VIII | higher | BMS.754807 | higher | DMOG | higher | Methotrexate | lower |
| Camptothecin | lower | Bortezomib | lower | Etoposide | lower | MG.132 | NA |
| AP.24534 | NA | Bosutinib | NA | FH535 | NA | Midostaurin | NA |
| AS601245 | NA | Bryostatin.1 | higher | FTI.277 | lower | Mitomycin.C | lower |
| ATRA | lower | BX.795 | higher | GDC.0449 | NA | MK.2206 | NA |
| AUY922 | NA | Doxorubicin | lower | GDC0941 | higher | MS.275 | lower |
| Cisplatin | lower | CCT007093 | higher | Gefitinib | higher | Nilotinib | lower |
| AZ628 | NA | CCT018159 | lower | Gemcitabine | lower | NSC.87877 | lower |
| AZD.0530 | higher | CEP.701 | NA | GNF.2 | higher | NU.7441 | NA |
| AZD.2281 | lower | CGP.082996 | NA | GSK.650394 | lower | Nutlin.3a | higher |
| AZD6244 | higher | CGP.60474 | NA | GSK269962A | NA | NVP.BEZ235 | NA |
| AZD6482 | higher | CHIR.99021 | higher | GW.441756 | higher | NVP.TAE684 | NA |
| AZD7762 | NA | CI.1040 | higher | GW843682X | lower | Obatoclax.Mesylate | lower |
| AZD8055 | NA | Sorafenib | lower | Imatinib | higher | OSI.906 | higher |
| BAY.61.3606 | lower | CMK | lower | IPA.3 | lower | PAC.1 | NA |
| Bexarotene | higher | Cyclopamine | NA | JNJ.26854165 | higher | Paclitaxel | lower |
| BI.2536 | lower | Cytarabine | lower | JNK.9L | NA | Parthenolide | lower |
| BI.D1870 | lower | Dasatinib | higher | JNK.Inhibitor.VIII | lower | Pazopanib | NA |
| BIBW2992 | lower | AMG.706 | higher | JW.7.52.1 | lower | PD.0325901 | higher |
| PD.0332991 | higher | RDEA119 | higher | Sunitinib | NA | VX.702 | higher |
| PD.173074 | lower | RO.3306 | lower | TCGA | NA | WH.4.023 | NA |
| PF.02341066 | higher | Roscovitine | higher | Temsirolimus | higher | WO2009093972 | higher |
| PF.4708671 | lower | S.Trityl.L.cysteine | lower | Thapsigargin | NA | WZ.1.84 | NA |
| PF.562271 | higher | Salubrinal | lower | Tipifarnib | lower | X17.AAG | NA |
| PHA.665752 | NA | SB.216763 | higher | TW.37 | lower | X681640 | NA |
| PLX4720 | lower | SB590885 | NA | Vinblastine | lower | XMD8.85 | higher |
| Pyrimethamine | lower | Shikonin | lower | Vinorelbine | lower | Z.LLNle.CHO | NA |
| QS11 | lower | SL.0101.1 | lower | Vorinostat | lower | ZM.447439 | lower |
| Rapamycin | lower | Erlotinib | higher | VX.680 | lower |  |  |
